# Supplementary material for: Coordination polymer-derived Al3+-doped V2O3/C with rich oxygen vacancies for an advanced aqueous zinc-ion battery with ultrahigh rate capability
Source: Royal Society of Chemistry journal article supplement (doi:10.1039/d2se00049k), 2022-01-01
Supplement: d2se00049k1.pdf [file d2se00049k1.pdf]

## Supporting Information

### Coordination polymer-derived Al<sup>3+</sup>-doped V<sub>2</sub>O<sub>3</sub>/C with rich oxygen vacancies for advanced aqueous zinc-ion battery with ultrahigh rate capability

Chang Lin Liu, Yang Liu, Xing Liu and Yun Gong\*

Department of Applied Chemistry, College of Chemistry and Chemical Engineering, Chongqing University, Chongqing 401331, P. R. China Tel: +86-023-65678932 E-mail: gongyun7211@cqu.edu.cn

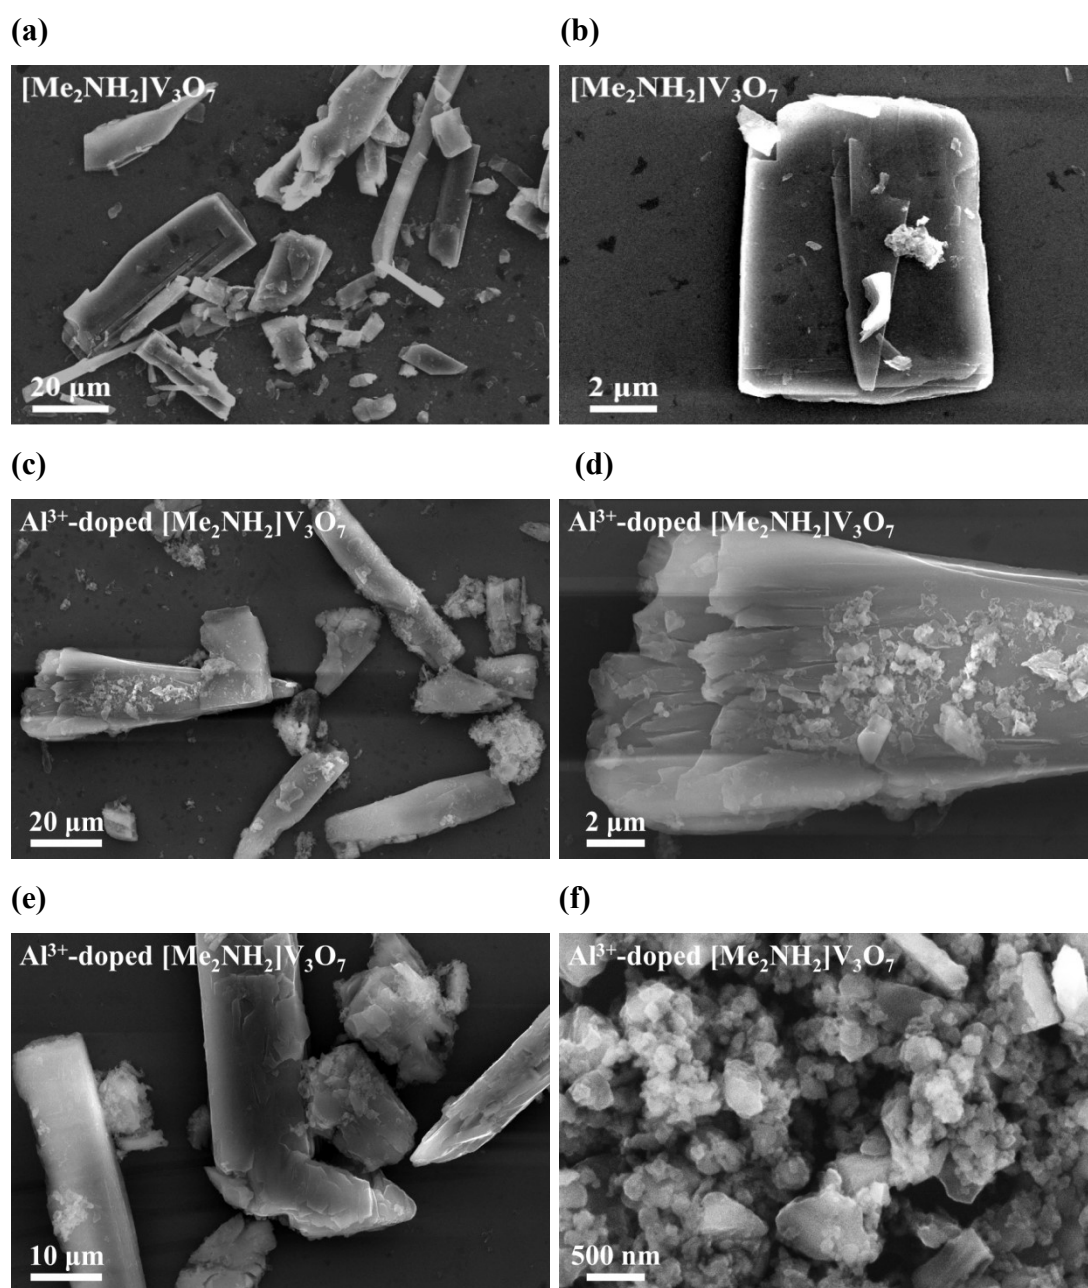

**Figure S1** SEM images of (a, b)  $[\text{Me}_2\text{NH}_2]\text{V}_3\text{O}_7$  and (c-f)  $\text{Al}^{3+}$ -doped  $[\text{Me}_2\text{NH}_2]\text{V}_3\text{O}_7$ .

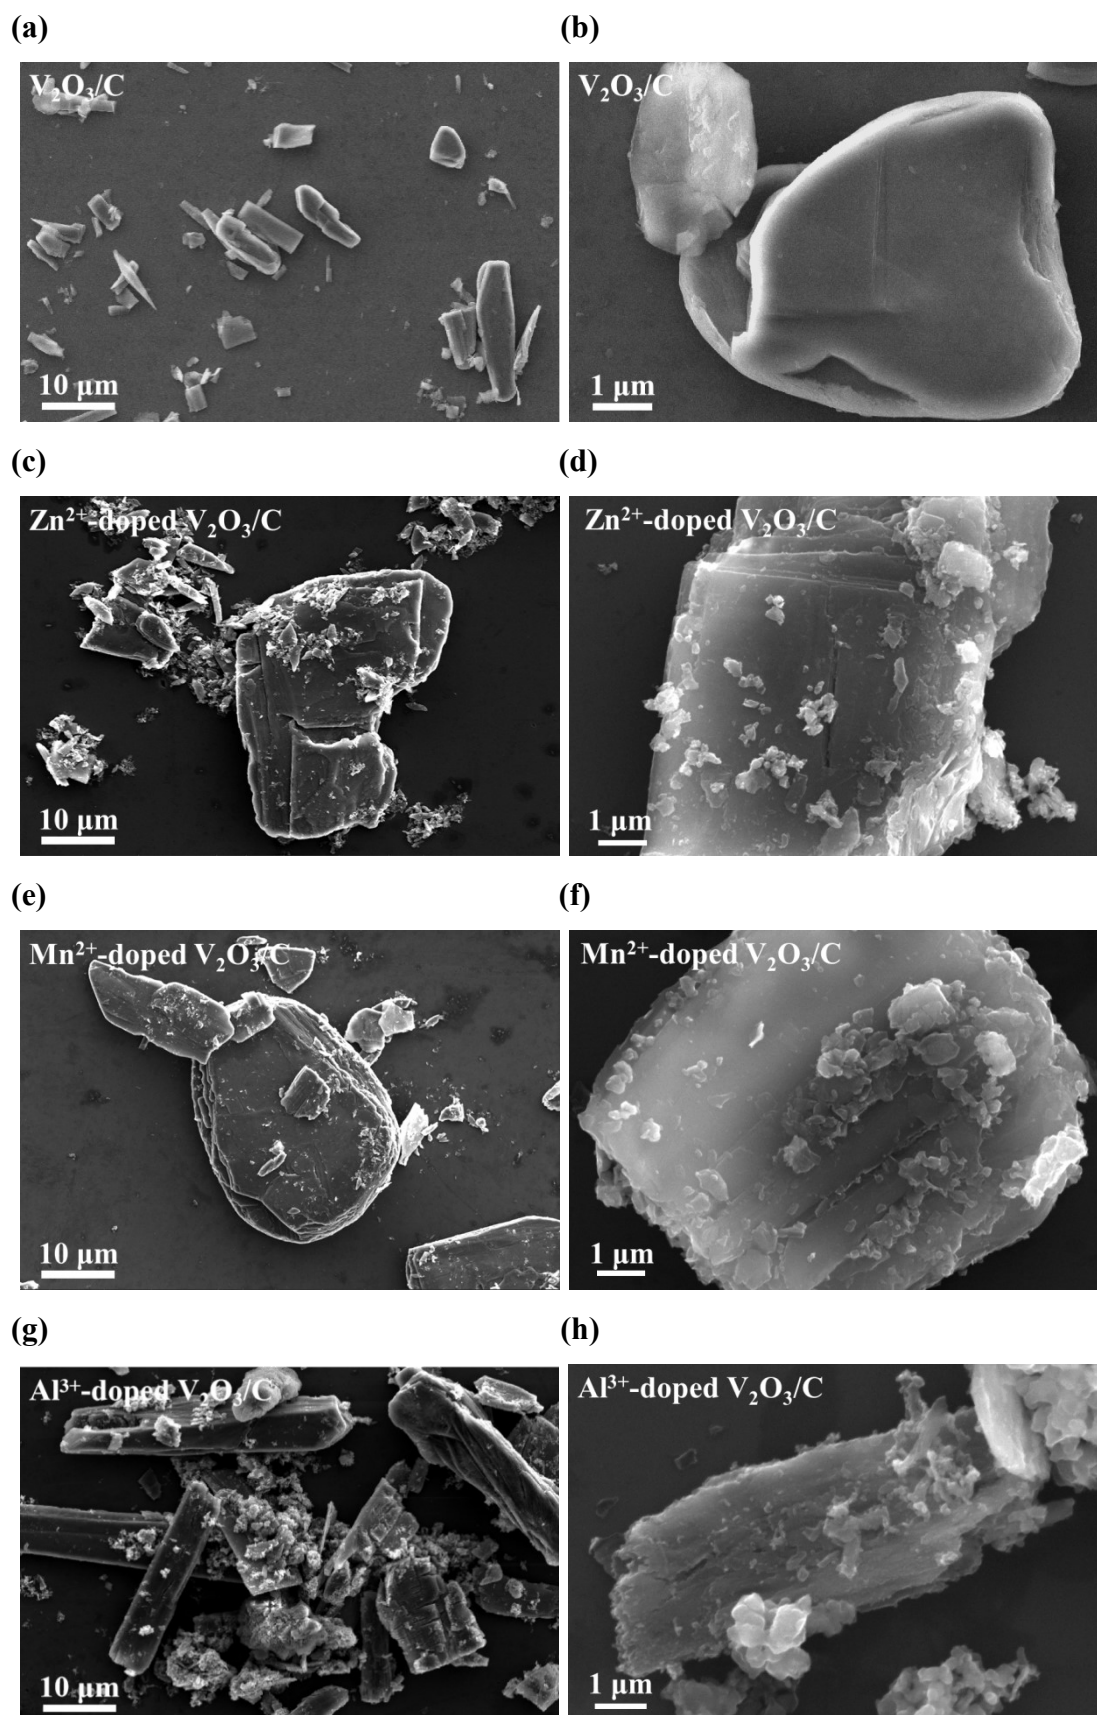

(i)

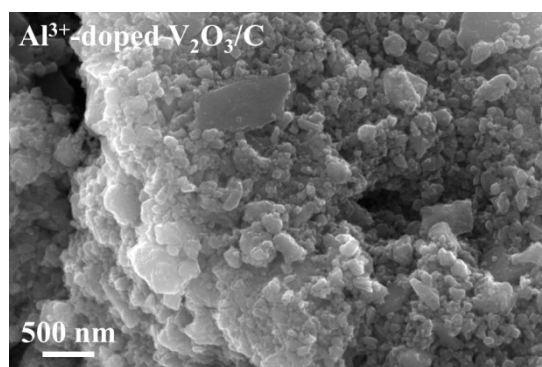

**Figure S2** SEM images of (a, b)  $\text{V}_2\text{O}_3/\text{C}$ , (c, d)  $\text{Zn}^{2+}$ -doped  $\text{V}_2\text{O}_3/\text{C}$ , (e, f)  $\text{Mn}^{2+}$ -doped  $\text{V}_2\text{O}_3/\text{C}$  and (g-i)  $\text{Al}^{3+}$ -doped  $\text{V}_2\text{O}_3/\text{C}$ .

(a)

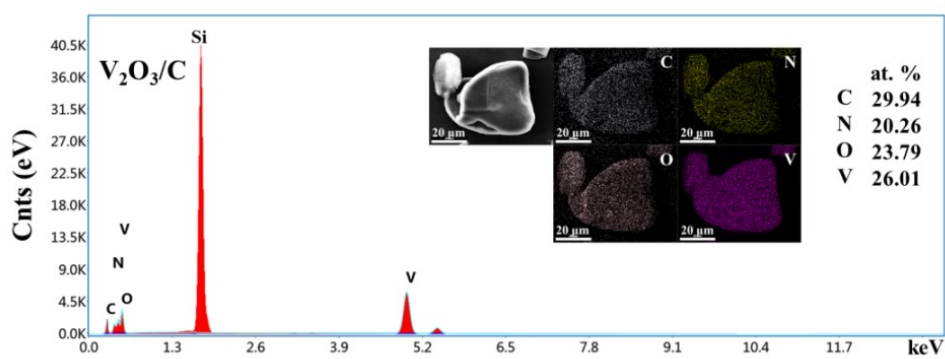

(b)

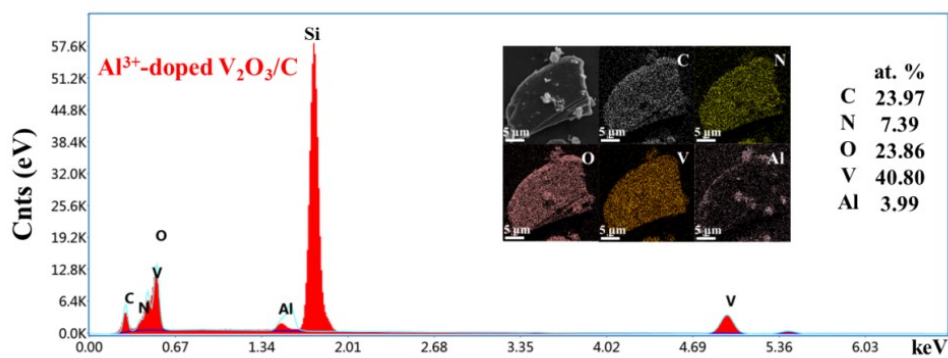

(c)

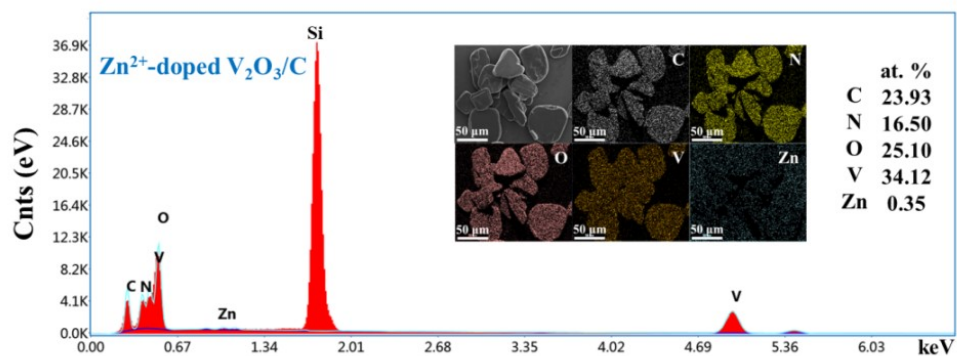

(d)

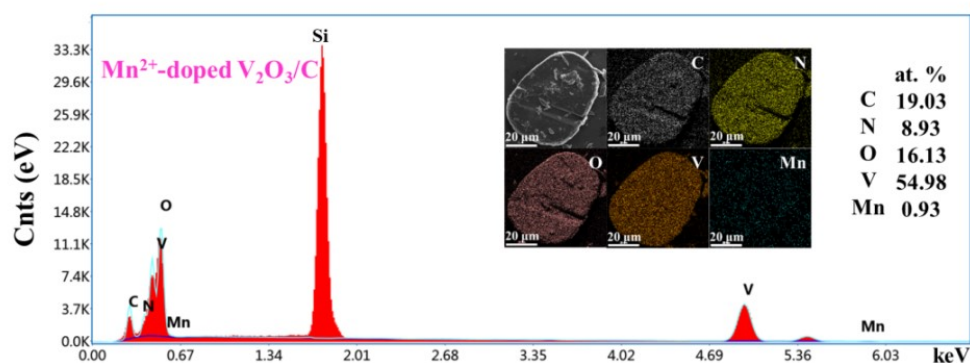

**Figure S3** EDS and elemental mappings (inset) of (a)  $V_2O_3/C$ , (b)  $Al^{3+}$ -doped  $V_2O_3/C$ , (c)  $Zn^{2+}$ -doped  $V_2O_3/C$  and (d)  $Mn^{2+}$ -doped  $V_2O_3/C$ .

## S1 Syntheses, compositions and morphologies of $[C_5H_{10}NH_2]V_3O_7$ and $V_2O_3/C-p$

### S1.1 Syntheses of $[C_5H_{10}NH_2]V_3O_7$ and $V_2O_3/C-p$

The  $[C_5H_{10}NH_2]V_3O_7$  precursor was prepared under the same condition except that piperidine ( $C_5H_{10}NH$ ) (0.375 mL, 2.5 mmol) was used instead of DMF (1 mL) in the synthesis of  $[Me_2NH_2]V_3O_7$ .<sup>1</sup> And  $V_2O_3/C-p$  was obtained via the same annealing method except that 100 mg  $[C_5H_{10}NH_2]V_3O_7$  precursor was annealed instead of  $[Me_2NH_2]V_3O_7$  in the synthesis of  $V_2O_3/C$  (**Scheme S1**).

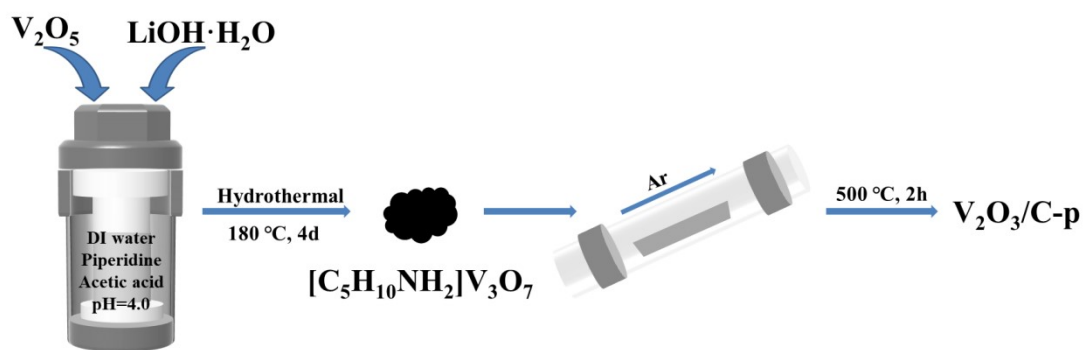

**Scheme S1** The synthesis procedures of  $[C_5H_{10}NH_2]V_3O_7$  and  $V_2O_3/C-p$ .

### S1.2 Structure and morphology of $[C_5H_{10}NH_2]V_3O_7$

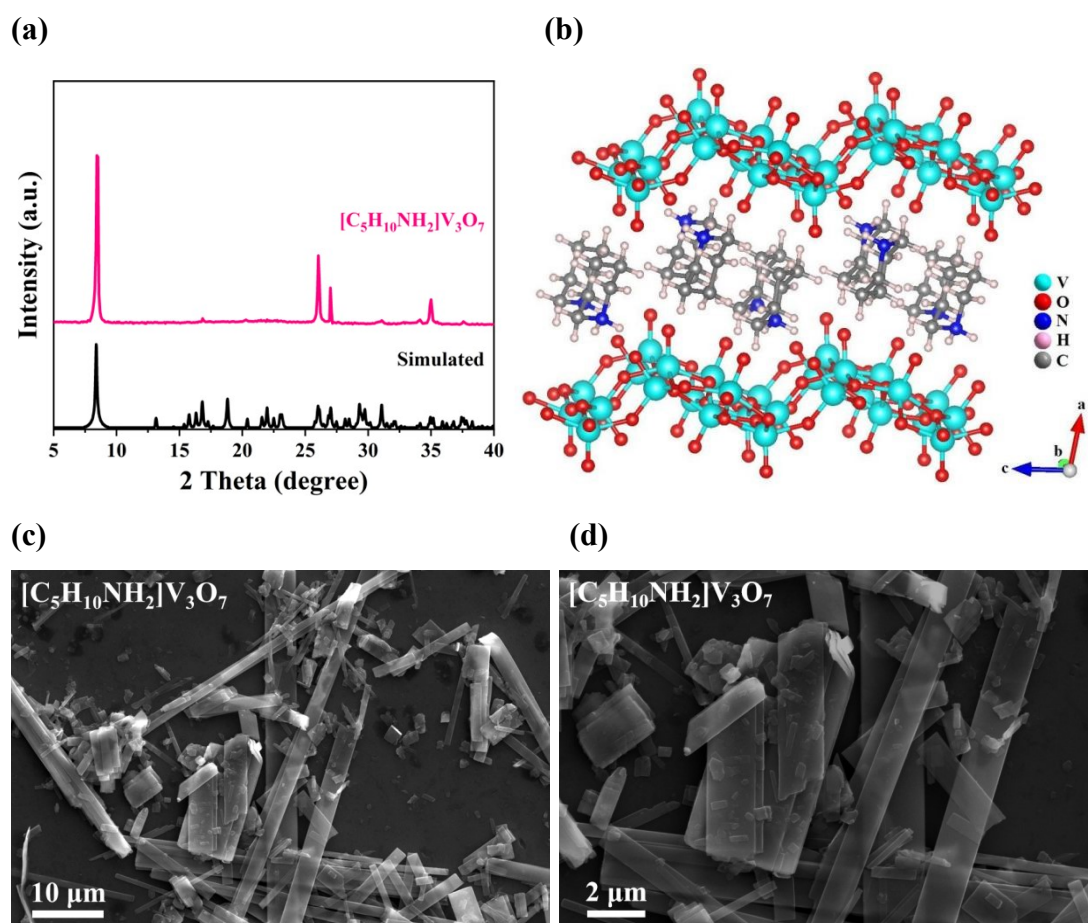

**Figure S4** (a) XRD pattern of  $[C_5H_{10}NH_2]V_3O_7$  and the simulated profile; (b)  $[V_3O_7]^{4-}$  anionic layers and lamellar  $[C_5H_{10}NH_2]^+$  cations in  $[C_5H_{10}NH_2]V_3O_7$ ; (c, d) SEM images of  $[C_5H_{10}NH_2]V_3O_7$ .

The XRD pattern of  $[C_5H_{10}NH_2]V_3O_7$  is shown in **Figure S4a**, which meets well with the simulated profile based on the single crystal diffraction data (CCDC No.



235654),<sup>1</sup> indicating the successful preparation of the sample without impurity. As shown in **Figure S4b**,  $[\text{C}_5\text{H}_{10}\text{NH}_2]\text{V}_3\text{O}_7$  possesses the same 2D  $[\text{V}^{\text{IV}}_2\text{V}^{\text{V}}\text{O}_7]^-$  anionic skeleton, however, the interlayer uncoordinated cation is the protonated piperidine cation  $[\text{C}_5\text{H}_{10}\text{NH}_2]^+$ . The result elucidates the generality for the synthesis of the  $[\text{V}_3\text{O}_7]^-$ -based coordination polymer.

As shown in **Figure S4(c, d)**, the morphology of  $[\text{C}_5\text{H}_{10}\text{NH}_2]\text{V}_3\text{O}_7$  displays regular nanobelts, demonstrating that the different interlayer cations lead to different morphologies.

### S1.3 Composition and morphology of $\text{V}_2\text{O}_3/\text{C-p}$

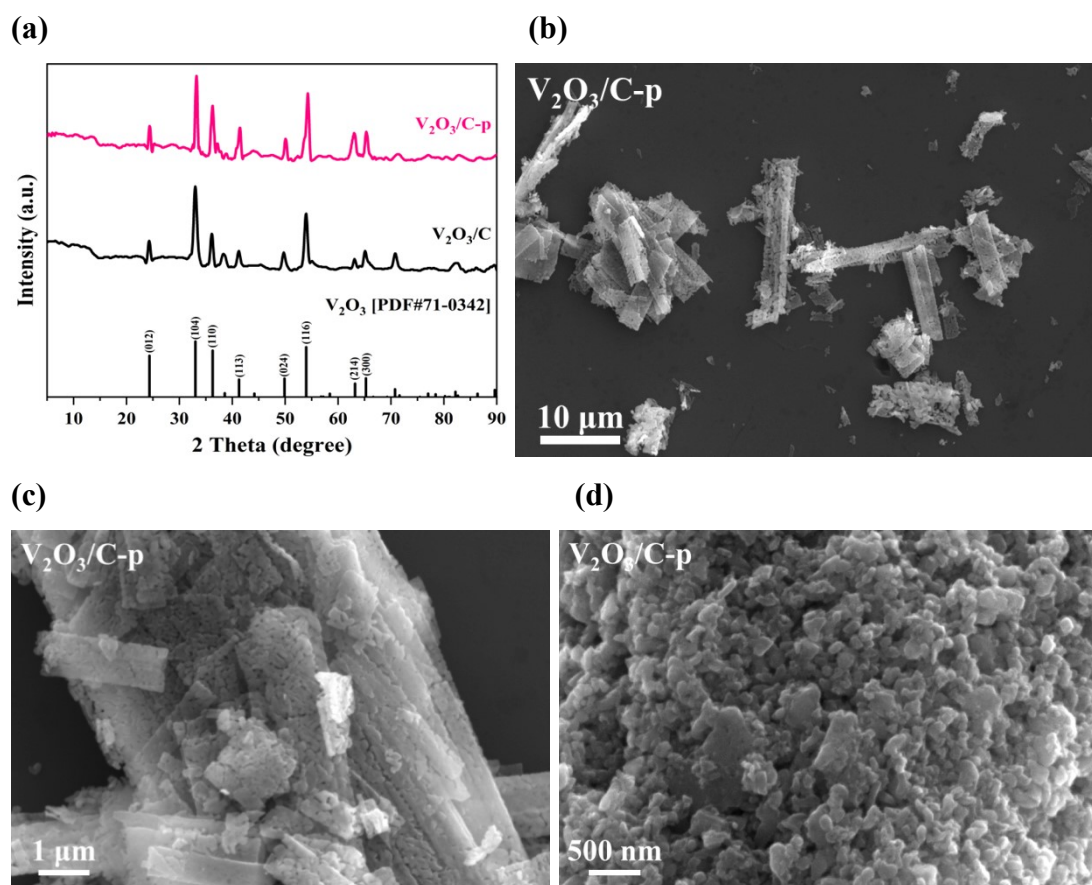

**Figure S5** (a) XRD pattern and (b-d) SEM images of  $\text{V}_2\text{O}_3/\text{C-p}$ .

$\text{V}_2\text{O}_3/\text{C-p}$  was synthesized via calcination of  $[\text{C}_5\text{H}_{10}\text{NH}_2]\text{V}_3\text{O}_7$ . The XRD pattern of  $\text{V}_2\text{O}_3/\text{C-p}$  is shown in **Figure S5a**, which meets well with that of the hexagonal  $\text{V}^{\text{III}}_2\text{O}_3$  (PDF#71-0342). Similarly, the broad peak in the range of  $10 \sim 15^\circ$  is attributed to amorphous carbon, which originates from the decomposition of  $[\text{C}_5\text{H}_{10}\text{NH}_2]^+$  cations during annealing, inferring the formation of  $\text{V}_2\text{O}_3/\text{C}$  composite. The result depicts that regardless of  $[\text{Me}_2\text{NH}_2]\text{V}_3\text{O}_7$  and  $[\text{C}_5\text{H}_{10}\text{NH}_2]\text{V}_3\text{O}_7$ , their

annealed products are both  $V_2O_3/C$  composites, which is probably because they possess the same 2D  $[V_3O_7]^-$  anionic skeleton.

As shown **Figure S5(b-d)**, similar to the  $[C_5H_{10}NH_2]V_3O_7$  precursor,  $V_2O_3/C-p$  preserves a nanobelt-like contour, which is composed of numerous nanoparticles (NPs). It is expected that the *in situ*-yielded carbon can combine oxygen to release  $CO_2$  ( $C + O_2 \rightarrow CO_2$ ) during the high temperature annealing process, leading to the formation of the porous nanobelt and the reduction of  $[V^{IV}_2V^V O_7]^-$  into  $V^{III}_2O_3$ .

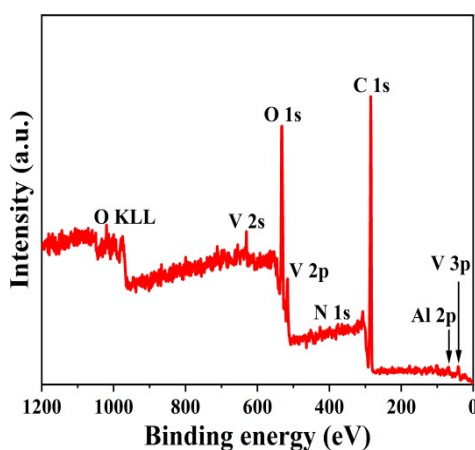

**Figure S6** The survey spectrum of  $Al^{3+}$ -doped  $V_2O_3/C$ .

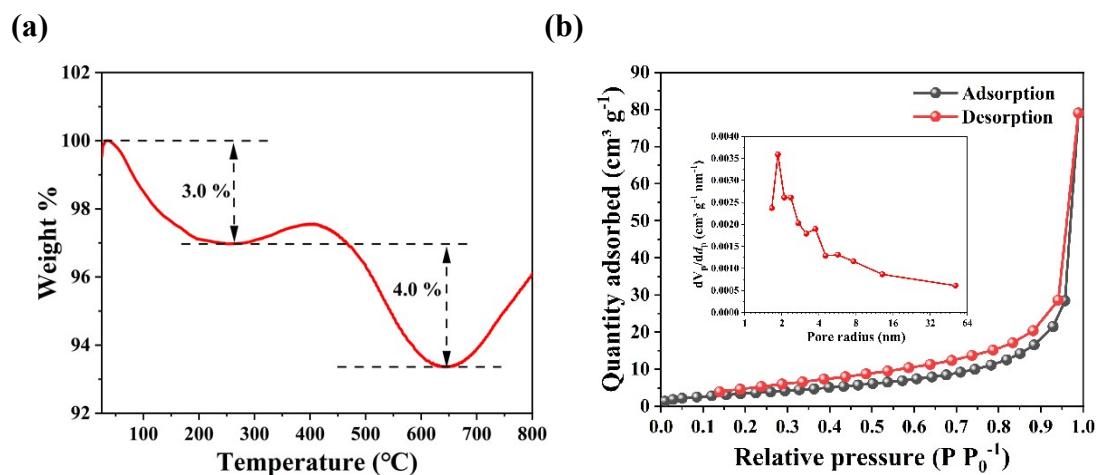

**Figure S7** (a) TG analysis of  $Al^{3+}$ -doped  $V_2O_3/C$ ; (b) Nitrogen adsorption-desorption isotherms and the corresponding pore-size distribution curve (inset) of  $Al^{3+}$ -doped  $V_2O_3/C$ .

**Table S1** The electrochemical performances of Al<sup>3+</sup>-doped V<sub>2</sub>O<sub>3</sub>/C in comparison with some vanadium-based materials

| Cathode                                                                            | Electrolyte                                                   | Voltage window | Specific capacity                                  | Cycle performance                                          | Ref              |
|------------------------------------------------------------------------------------|---------------------------------------------------------------|----------------|----------------------------------------------------|------------------------------------------------------------|------------------|
| Mg <sub>0.34</sub> V <sub>2</sub> O <sub>5</sub> ·0.8H <sub>2</sub> O              | 3 M Zn(CF <sub>3</sub> SO <sub>3</sub> ) <sub>2</sub>         | 0.1-1.8 V      | 353 mAh g <sup>-1</sup> at 0.05 A g <sup>-1</sup>  | 97 % retained after 2000 cycles at 5 A g <sup>-1</sup>     | 2                |
| VO <sub>2</sub>                                                                    | 3 M Zn(CF <sub>3</sub> SO <sub>3</sub> ) <sub>2</sub>         | 0.3-1.5 V      | 357 mAh g <sup>-1</sup> at 0.1 A g <sup>-1</sup>   | 91.2 % retained after 300 cycles at 0.75 A g <sup>-1</sup> | 3                |
| VO <sub>2</sub> /rGO                                                               | 3 M Zn(CF <sub>3</sub> SO <sub>3</sub> ) <sub>2</sub>         | 0.3-1.4 V      | 276 mAh g <sup>-1</sup> at 0.1 A g <sup>-1</sup>   | 99 % retained after 1000 cycles at 4 A g <sup>-1</sup>     | 4                |
| V <sub>2</sub> O <sub>5</sub> ·nH <sub>2</sub> O                                   | 3 M Zn(CF <sub>3</sub> SO <sub>3</sub> ) <sub>2</sub>         | 0.2-1.6 V      | 372 mAh g <sup>-1</sup> at 0.3 A g <sup>-1</sup>   | 71 % retained after 900 cycles at 6 A g <sup>-1</sup>      | 5                |
| V <sub>5</sub> O <sub>12</sub> ·6H <sub>2</sub> O                                  | 3 M Zn(CF <sub>3</sub> SO <sub>3</sub> ) <sub>2</sub>         | 0.2-1.6 V      | 354 mAh g <sup>-1</sup> at 0.5 A g <sup>-1</sup>   | 94 % retained after 1000 cycles at 2 A g <sup>-1</sup>     | 6                |
| Na <sub>2</sub> V <sub>6</sub> O <sub>16</sub> ·1.63H <sub>2</sub> O               | 3 M Zn(CF <sub>3</sub> SO <sub>3</sub> ) <sub>2</sub>         | 0.2-1.6 V      | 352 mAh g <sup>-1</sup> at 0.05 A g <sup>-1</sup>  | 90 % retained after 6000 cycles at 5 A g <sup>-1</sup>     | 7                |
| Mg <sub>0.1</sub> V <sub>2</sub> O <sub>5</sub> ·H <sub>2</sub> O                  | 3 M Zn(CF <sub>3</sub> SO <sub>3</sub> ) <sub>2</sub> PAM gel | 0.1-1.6 V      | 470 mAh g <sup>-1</sup> at 0.1 A g <sup>-1</sup>   | 95 % retained after 3000 cycles at 5 A g <sup>-1</sup>     | 8                |
| Zn <sub>2</sub> V <sub>2</sub> O <sub>7</sub>                                      | 1 M ZnSO <sub>4</sub>                                         | 0.2-1.4 V      | 248 mAh g <sup>-1</sup> at 0.05 A g <sup>-1</sup>  | 85 % retained after 1000 cycles at 4 A g <sup>-1</sup>     | 9                |
| H <sub>2</sub> V <sub>3</sub> O <sub>8</sub>                                       | 3 M Zn(CF <sub>3</sub> SO <sub>3</sub> ) <sub>2</sub>         | 0.2-1.6 V      | 423.8 mAh g <sup>-1</sup> at 0.1 A g <sup>-1</sup> | 94.3 % retained after 1000 cycles at 5 A g <sup>-1</sup>   | 10               |
| Ba <sub>1.2</sub> V <sub>6</sub> O <sub>16</sub> ·3H <sub>2</sub> O                | 2 M ZnSO <sub>4</sub>                                         | 0.3-1.4 V      | 321.2 mAh g <sup>-1</sup> at 0.1 A g <sup>-1</sup> | 95.6 % retained after 2000 cycles at 5 A g <sup>-1</sup>   | 11               |
| NaV <sub>6</sub> O <sub>15</sub> /V <sub>2</sub> O <sub>5</sub>                    | 2 M Zn(CF <sub>3</sub> SO <sub>3</sub> ) <sub>2</sub>         | 0.2-1.8 V      | 390 mAh g <sup>-1</sup> at 0.3 A g <sup>-1</sup>   | 92.3 % retained after 3000 cycles at 5 A g <sup>-1</sup>   | 12               |
| Ca <sub>0.23</sub> V <sub>2</sub> O <sub>5</sub> ·0.95H <sub>2</sub> O             | 3 M Zn(CF <sub>3</sub> SO <sub>3</sub> ) <sub>2</sub>         | 0.2-1.6 V      | 355.2 mAh g <sup>-1</sup> at 0.2 A g <sup>-1</sup> | 97.7 % retained after 2000 cycles at 5 A g <sup>-1</sup>   | 13               |
| Zn <sub>3</sub> V <sub>2</sub> O <sub>7</sub> (OH) <sub>2</sub> ·2H <sub>2</sub> O | 1 M ZnSO <sub>4</sub>                                         | 0.2-1.8 V      | 213 mAh g <sup>-1</sup> at 0.05 A g <sup>-1</sup>  | 68 % retained after 300 cycles at 0.2 A g <sup>-1</sup>    | 14               |
| V <sub>10</sub> O <sub>24</sub> ·12H <sub>2</sub> O                                | 3 M Zn(CF <sub>3</sub> SO <sub>3</sub> ) <sub>2</sub>         | 0.7-1.7 V      | 164.5 mAh g <sup>-1</sup> at 0.2 A g <sup>-1</sup> | 80.1 % retained after 3000 cycles at 10 A g <sup>-1</sup>  | 15               |
| Al <sup>3+</sup> -doped V <sub>2</sub> O <sub>3</sub> /C                           | 3 M Zn(CF <sub>3</sub> SO <sub>3</sub> ) <sub>2</sub>         | 0.2-1.6 V      | 375 mAh g <sup>-1</sup> at 0.2 A g <sup>-1</sup>   | 94.7 % retained after 1000 cycles at 5 A g <sup>-1</sup>   | <b>This work</b> |

## S2 Electrochemical performance of V<sub>2</sub>O<sub>3</sub>/C-p in comparison with that of V<sub>2</sub>O<sub>3</sub>/C

In order to explore the effect of the morphology on the electrochemical behavior, the rate and cycling performances of V<sub>2</sub>O<sub>3</sub>/C-p was also measured in comparison with V<sub>2</sub>O<sub>3</sub>/C. As shown in **Figure S8a**, V<sub>2</sub>O<sub>3</sub>/C-p can deliver an average capacity of 308,



296, 298, 285, 265 and 195 mAh g<sup>-1</sup> at 0.1, 0.2, 0.5, 1, 2 and 5 A g<sup>-1</sup>, respectively, and recover to 335 mAh g<sup>-1</sup> at 0.1 A g<sup>-1</sup>, which are higher than those of V<sub>2</sub>O<sub>3</sub>/C. It is associated with the porous nanobelts built by numerous nanoparticles in V<sub>2</sub>O<sub>3</sub>/C-p, which is beneficial for the diffusion of electrolyte ions and facilitate the exposure of active sites, thus enhance the storage of Zn<sup>2+</sup>. However, the cycling performance of V<sub>2</sub>O<sub>3</sub>/C-p is inferior to that of V<sub>2</sub>O<sub>3</sub>/C though V<sub>2</sub>O<sub>3</sub>/C-p can provide a larger initial capacity of 263 mAh g<sup>-1</sup> at 5 A g<sup>-1</sup>, it sharply declines to 20 mAh g<sup>-1</sup> at the end of 1000 cycles with a capacity retention of only 7.6 % (**Figure S8b**), suggesting the porous nanobelts also favor for the capacity decay.

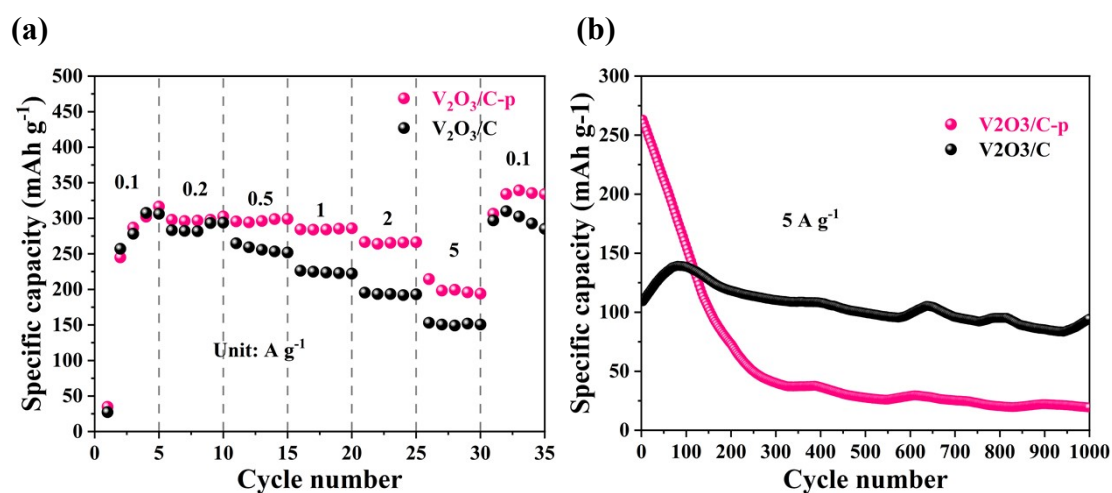

**Figure S8** (a) Rate capability and (b) long-life cycling performances of V<sub>2</sub>O<sub>3</sub>/C-p in comparison with V<sub>2</sub>O<sub>3</sub>/C.

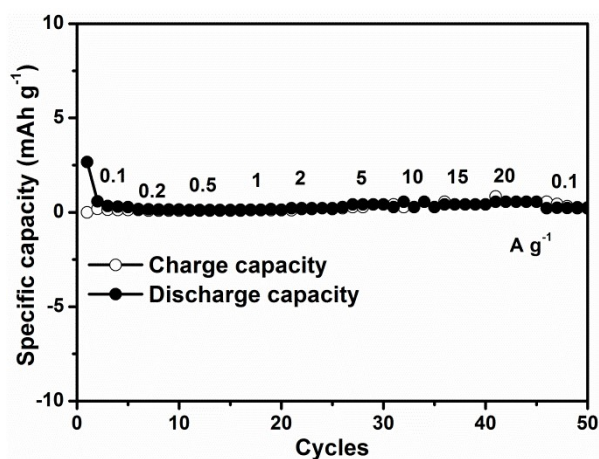

**Figure S9** Rate performance of the pure graphite

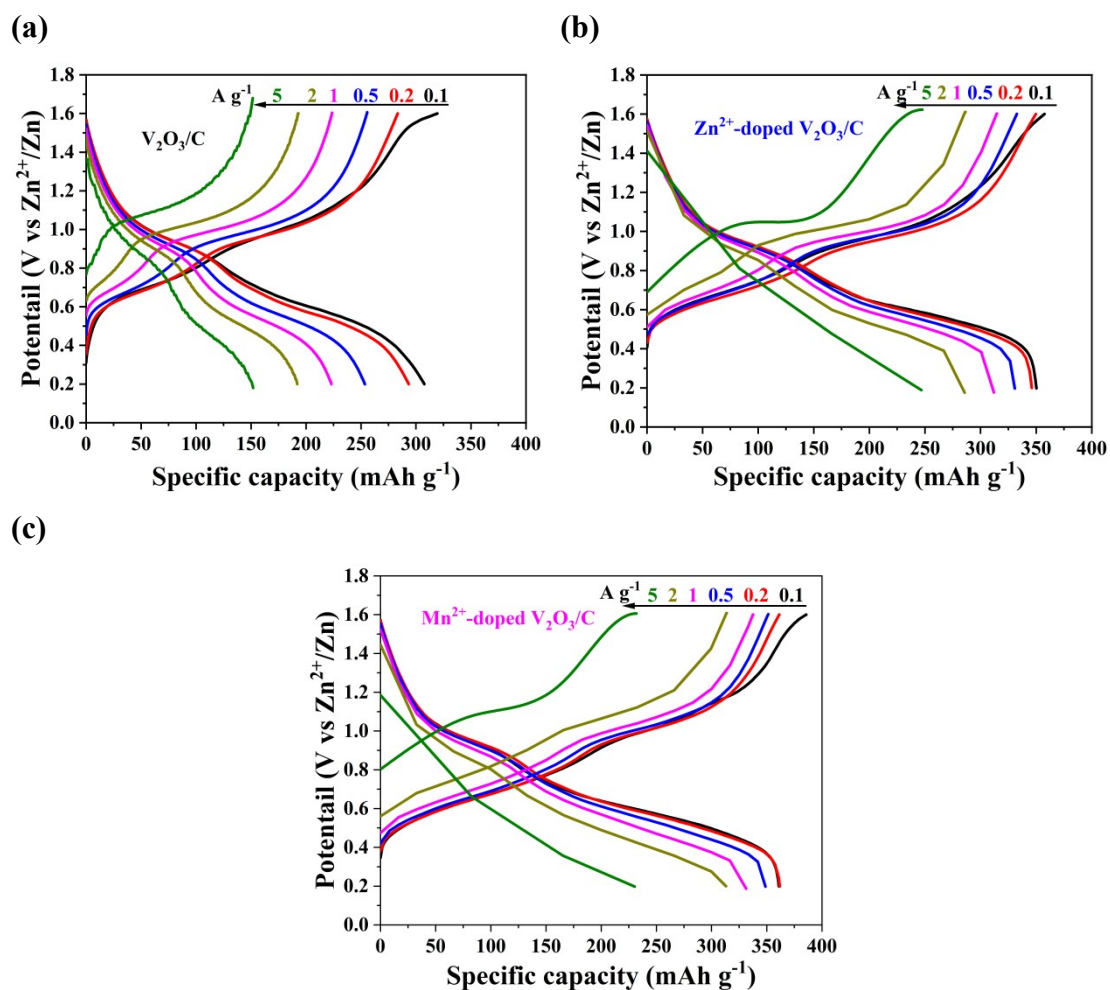

**Figure S10** Discharge-charge curves of (a) V<sub>2</sub>O<sub>3</sub>/C, (b) Zn<sup>2+</sup>-doped V<sub>2</sub>O<sub>3</sub>/C and (c) Mn<sup>2+</sup>-doped V<sub>2</sub>O<sub>3</sub>/C at various current densities from 0.1 to 5 A g<sup>-1</sup>.

**Table S2** The parameters in the simulated equivalent circuit for Al<sup>3+</sup>-doped V<sub>2</sub>O<sub>3</sub>/C and V<sub>2</sub>O<sub>3</sub>/C

|                                                          | $R_s$ ( $\Omega$ cm <sup>-2</sup> ) | $R_{ct}$ ( $\Omega$ cm <sup>-2</sup> ) | CPE | $R_1$ ( $\Omega$ cm <sup>-2</sup> ) |
|----------------------------------------------------------|-------------------------------------|----------------------------------------|-----|-------------------------------------|
| Al <sup>3+</sup> -doped V <sub>2</sub> O <sub>3</sub> /C | 3.7                                 | 5.1                                    | 0.7 | 11.3                                |
| V <sub>2</sub> O <sub>3</sub> /C                         | 2.2                                 | 13.5                                   | 0.6 | 8.9                                 |

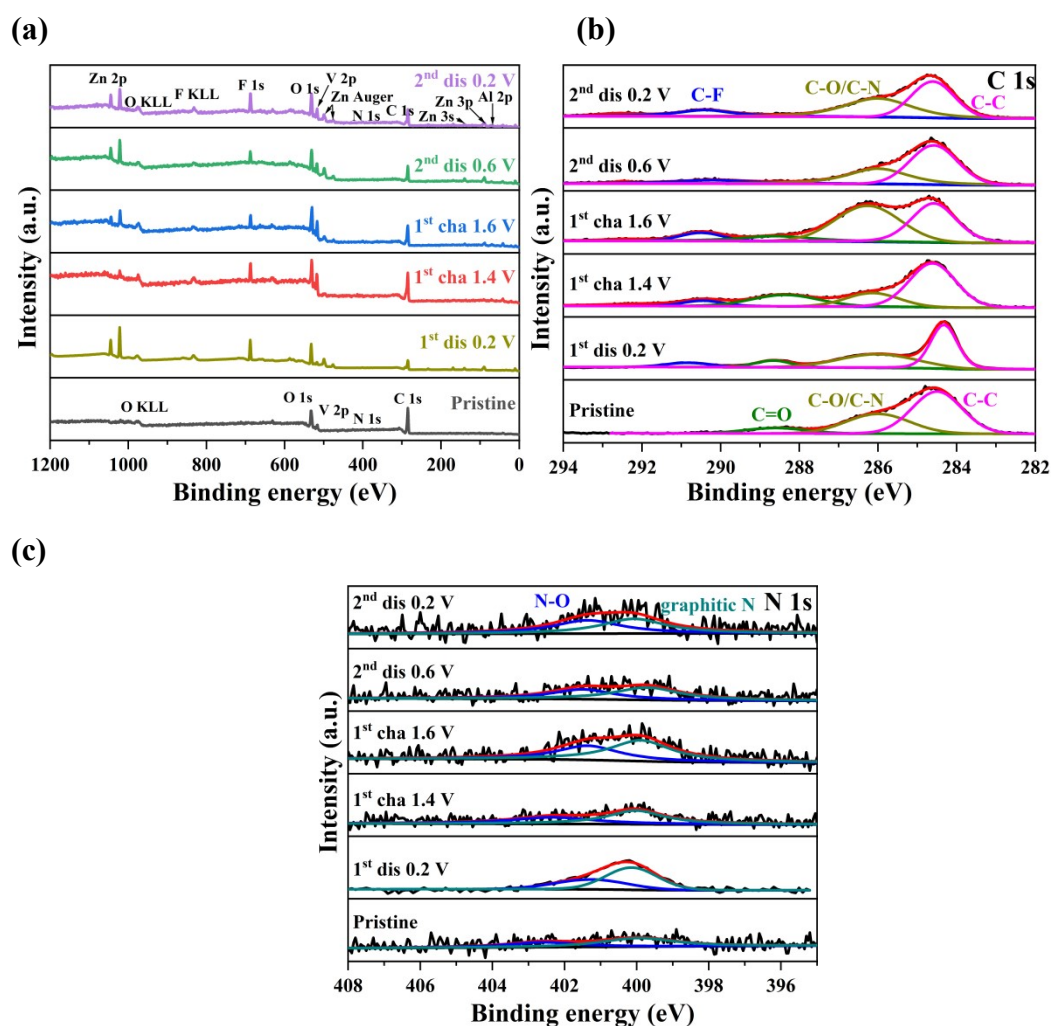

**Figure S11** XPS spectra of (a) survey, (b) C 1s and (c) N 1s of the  $\text{Al}^{3+}$ -doped  $\text{V}_2\text{O}_3/\text{C}$  electrode at different states.

## S2 *Ex situ* SEM, EDS and elemental mappings of the $\text{Al}^{3+}$ -doped $\text{V}_2\text{O}_3/\text{C}$ electrode

In order to obtain deeper insight into the compositional evolution during the discharge/charge process, *ex situ* SEM (Figure S12a-t), EDS and elemental mappings (Figure S13a-j) of the  $\text{Al}^{3+}$ -doped  $\text{V}_2\text{O}_3/\text{C}$  electrode were performed. As shown in Figure S12(a, b), upon the 1<sup>st</sup> charge to 0.6 V, the sample exhibits stacked sheets with nanoparticles on the surfaces, which is similar to the morphology of the pristine sample (Figure S2g-i). The amount of carbon (64.15 at. %) (Figure S13a and Table S3) in the discharged cathode is larger than that in the pristine sample (23.97 at. %),

which is mainly due to the addition of conducting agent (graphite and acetylene black) for the fabrication of the electrode. As a result, the Al content is lowered to 1.68 at. % due to the dilution effect of the carbon additive. The F content (6.48 at. %) in the electrode mainly comes from the PVDF binder. Furthermore, the presence of Zn (1.73 at. %) in the discharged electrode illustrates the intercalation of  $\text{Zn}^{2+}$ . Upon further discharge to 0.2 V, the stacked sheets become loose and the electrode still keeps its original appearance because the 1<sup>st</sup> discharge process is short (ca. 40 min) (**Figure S12c, d**). Similarly, the morphologies of the  $\text{Al}^{3+}$ -doped  $\text{V}_2\text{O}_3/\text{C}$  electrode are preserved upon the 1<sup>st</sup> charge to 0.6 (**Figure S12e, f**) and 1.0 V (**Figure S12g, h**). It is consistent with their XRD patterns, which are almost the same as the pristine sample, indicating they maintain the structural integrity of  $\text{V}_2\text{O}_3$ .

However, upon the 1<sup>st</sup> charge to 1.4 V, XRD pattern discloses the formation of  $\text{Zn}_3(\text{OH})_2\text{V}_2\text{O}_7 \cdot 2\text{H}_2\text{O}$  with the disappearance of  $\text{V}_2\text{O}_3$ , the morphological change of the electrode is minor, which still displays nanoparticles on the surface of sheets (**Figure S12i, j**), indicating the transformation of  $\text{V}_2\text{O}_3 \rightarrow \text{Zn}_3(\text{OH})_2\text{V}_2\text{O}_7 \cdot 2\text{H}_2\text{O}$  occurs in the inner channel of corundum-type  $\text{V}_2\text{O}_3$ , which retains the original contour of the pristine sample. Although  $\text{V}_2\text{O}_3$  is nonporous, the oxygen vacancies in the structure can provide accessible sites for the binding of  $\text{Zn}^{2+}$ . That is to say, with the oxidation reaction proceeding, the valence state of V is increased, the high-valent V can combine the intercalated  $\text{Zn}^{2+}$  into  $\text{Zn}_3(\text{OH})_2\text{V}_2\text{O}_7 \cdot 2\text{H}_2\text{O}$ . As a result, the amount of oxygen deficiencies is decreased, which is consistent with the O 1s spectra. Similar phenomenon is observed upon deeply charged to 1.6 V. Although the XRD pattern at the fully charged state suggests the further transformation of  $\text{V}_2\text{O}_3 \rightarrow \text{Zn}_3(\text{OH})_2\text{V}_2\text{O}_7 \cdot 2\text{H}_2\text{O}$ , there is not obvious morphological change of the electrode (**Figure S12k, l**). However, as shown in **Scheme 1**, the corundum-type  $\text{V}_2\text{O}_3$

possesses a nonporous 3D architecture without free inner space, it is expected the inner accessible sites of  $V_2O_3$  is associated with its rich oxygen vacancies.

Based on XRD data, it is found  $Al^{3+}$ -doped  $V_2O_3/C$  has been replaced by  $Al^{3+}$ -doped  $Zn_3(OH)_2V_2O_7 \cdot 2H_2O/C$  after the 1<sup>st</sup> fully charged to 1.6 V, the subsequent discharge/charge process involves the redox reactions of  $Al^{3+}$ -doped  $Zn_3(OH)_2V_2O_7 \cdot 2H_2O/C$ . As a result, upon the 2<sup>nd</sup> discharge to 1.0 V, ultrathin nanosheets are observed on the outer surface of the  $Al^{3+}$ -doped  $Zn_3(OH)_2V_2O_7 \cdot 2H_2O/C$  sample (**Figure S12m, n**). The ultrathin nanosheets become more and more upon further discharge to 0.6 (**Figure S12o, p**) and 0.2 V (**Figure S12q, r**), which is the result of the  $H^+$  intercalation as evidenced by previous work,<sup>16-18</sup>. With the intercalation of  $H^+$  during the 2<sup>nd</sup> discharge process, the concentration of  $OH^-$  in the aqueous solution is excessive, which can combine  $Zn_x(CF_3SO_3)_y$  from the electrolyte solution into insoluble  $Zn_x(CF_3SO_3)_y(OH)_{2x-y} \cdot nH_2O$  on the outer surface of the electrode.<sup>17-19</sup> And the expectation can be proved by the *ex situ* EDS results. As shown in **Figure S13(g-i)** and **Table S3**, the F/S contents in the electrode increase from 5.43/0.15  $\rightarrow$  7.55/0.80  $\rightarrow$  9.18/1.85 at. % upon the 2<sup>nd</sup> discharge from 1.0  $\rightarrow$  0.6  $\rightarrow$  0.2 V. Furthermore, the (de)intercalation of  $H^+$  is almost reversible, upon the 2<sup>nd</sup> charge to 1.4 V, most of the ultrathin nanosheets have disappeared (**Figure S12s, t**) with the F/S contents drop to 6.36/0.24 at. % (**Figure S13j** and **Table S3**).

As for the content of Zn, it is increased from 2.96  $\rightarrow$  4.74  $\rightarrow$  6.68 at. % from the 2<sup>nd</sup> discharge to 1.0  $\rightarrow$  0.6  $\rightarrow$  0.2 V (**Figure S13g-i** and **Table S3**), which originate from the increase of the intercalated  $Zn^{2+}$  and adsorbed  $Zn^{2+}$  during the discharge process, agreeing with the Zn 2p spectra. And the Zn content drops to 6.68 at. % upon the 2<sup>nd</sup> charge to 1.4 V (**Figure S13j** and **Table S3**).

(a)

(b)



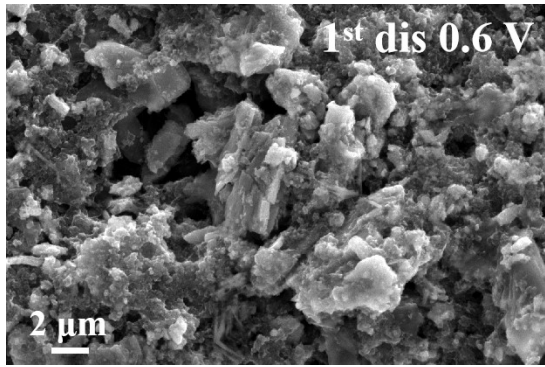

(c)

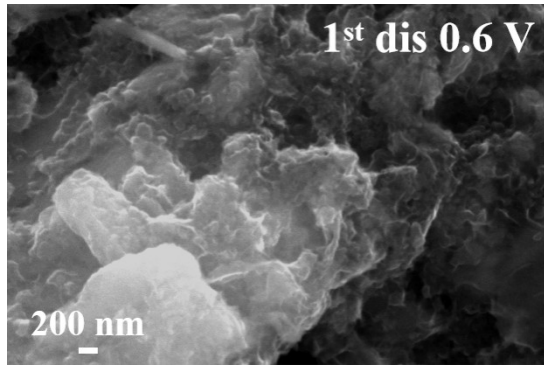

(d)

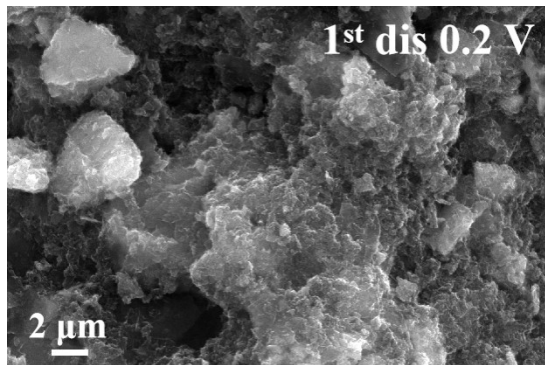

(e)

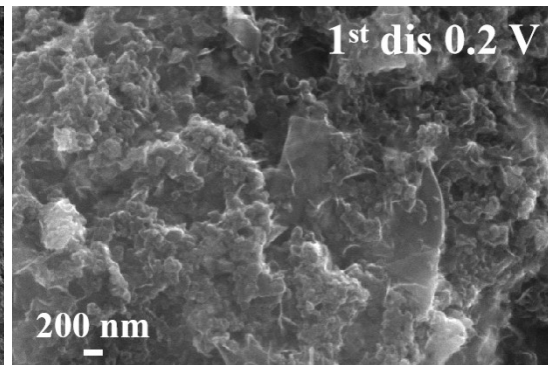

(f)

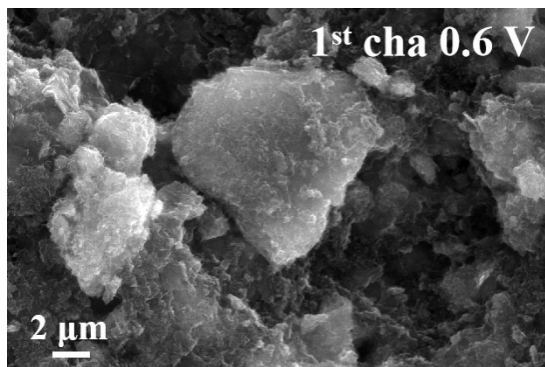

(g)

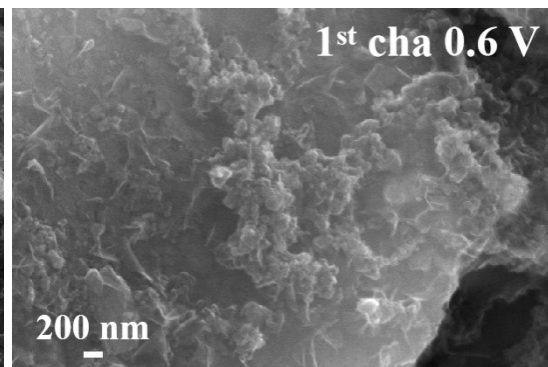

(h)

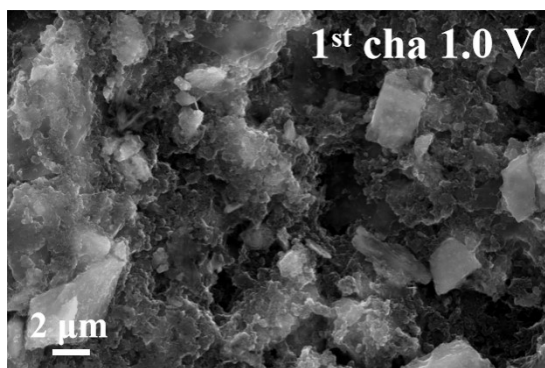

(i)

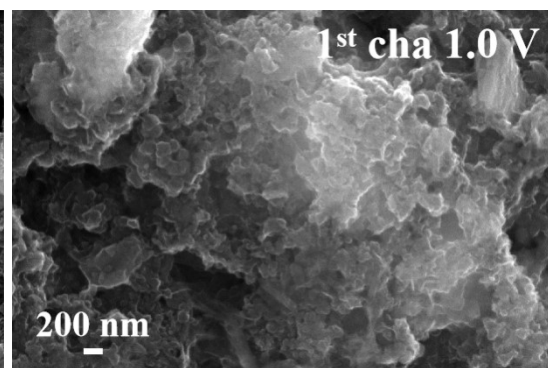

(j)

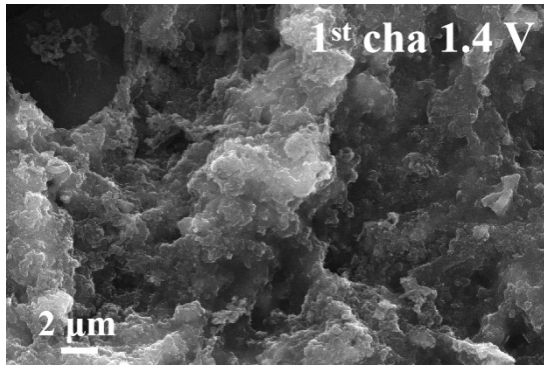

(k)

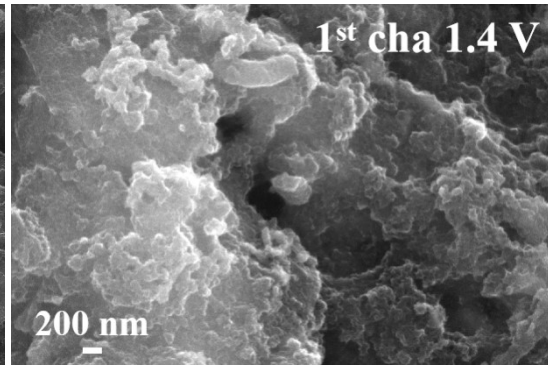

(l)

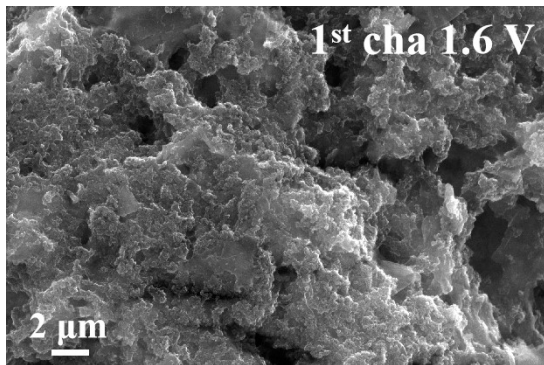

(m)

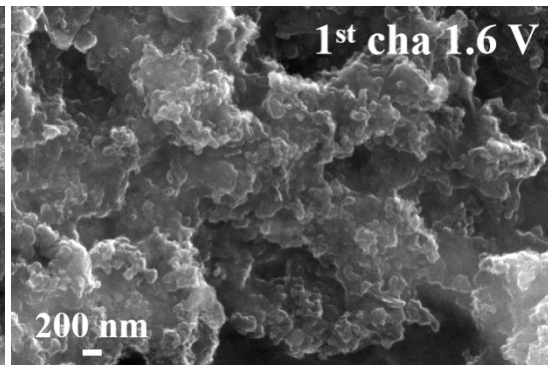

(n)

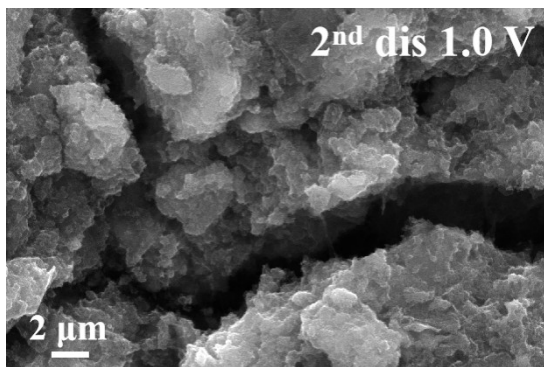

(o)

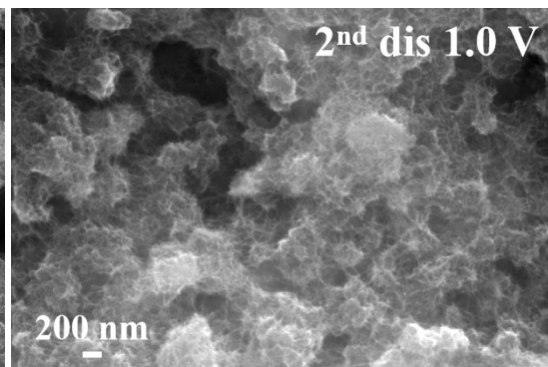

(p)

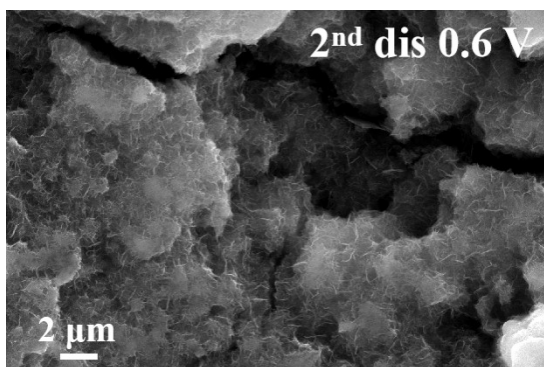

(q)

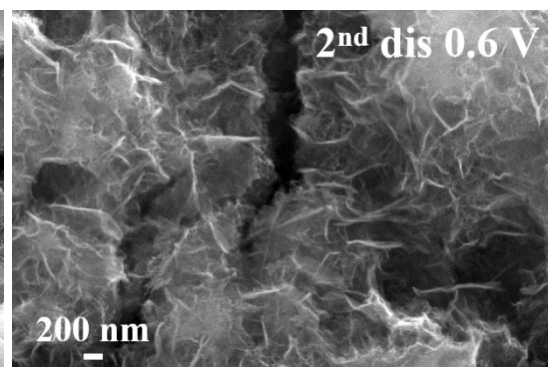

(r)

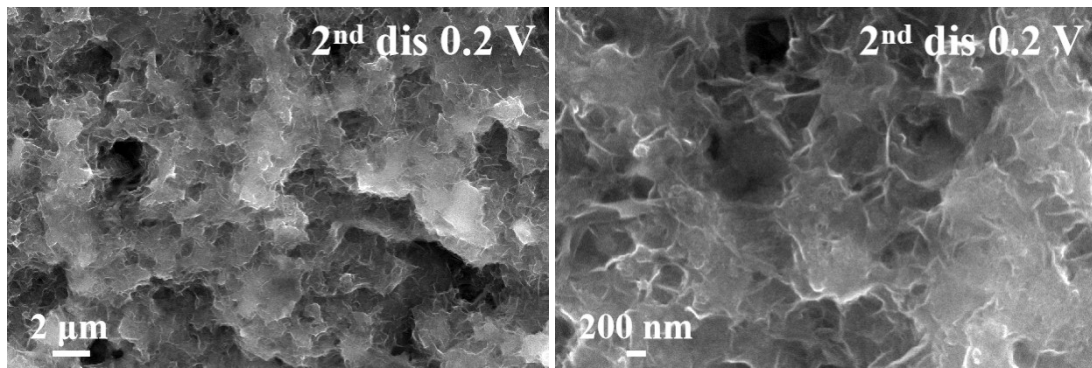

(s)

(t)

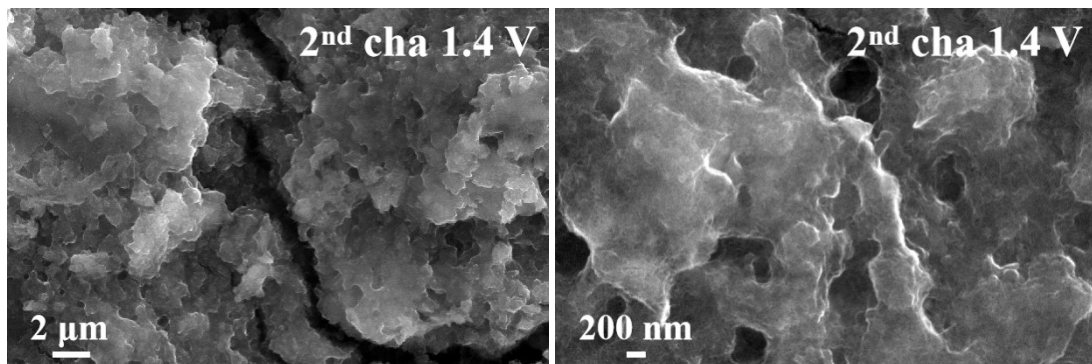

**Figure S12** *Ex situ* SEM images of the the Al<sup>3+</sup>-doped V<sub>2</sub>O<sub>3</sub>/C electrode at different states: 1<sup>st</sup> discharge to (a, b) 0.6 and (c, d) 0.2 V; 1<sup>st</sup> charge to (e, f) 0.6, (g, h) 1.0, (i, j) 1.4, and (k, l) 1.6 V; 2<sup>nd</sup> discharge to (m, n) 1.0, (o, p) 0.6 and (q, r) 0.2 V; (s, t) 2<sup>nd</sup> charge to 1.4 V.

(a)

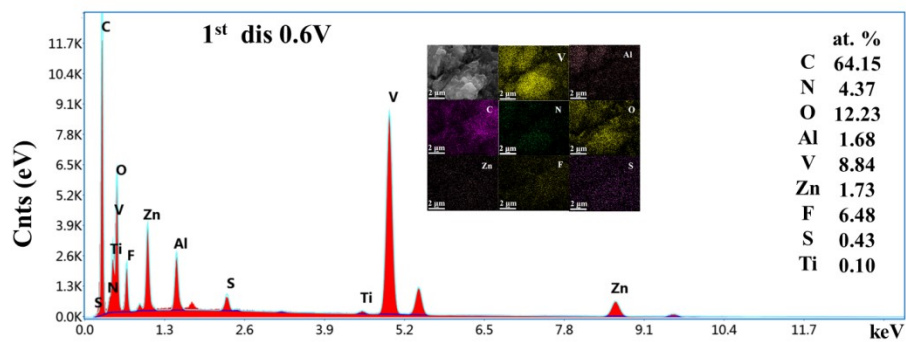

(b)

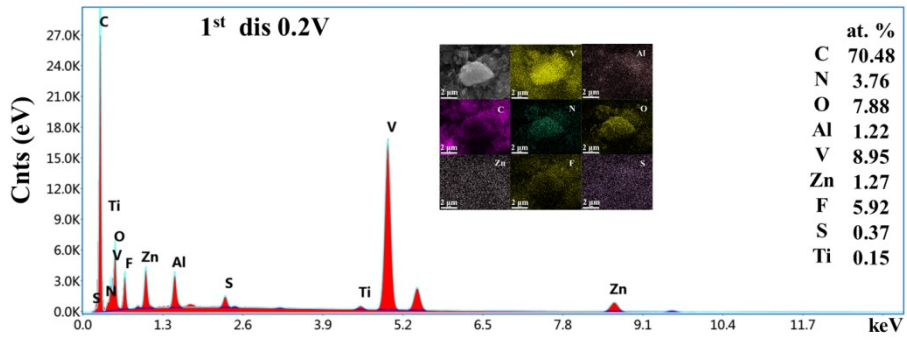

(c)

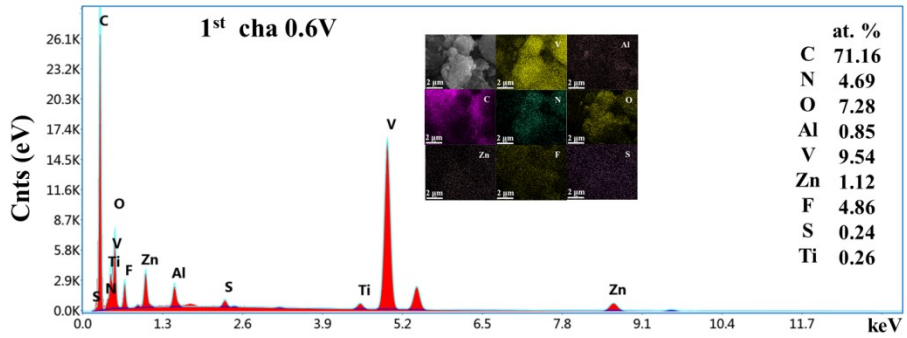

(d)

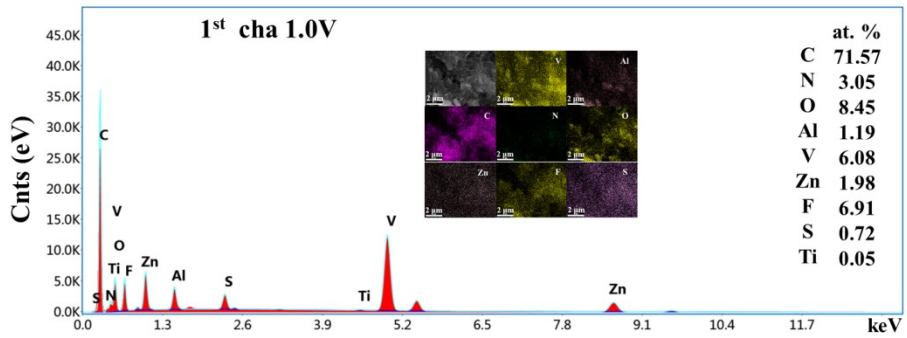

(e)

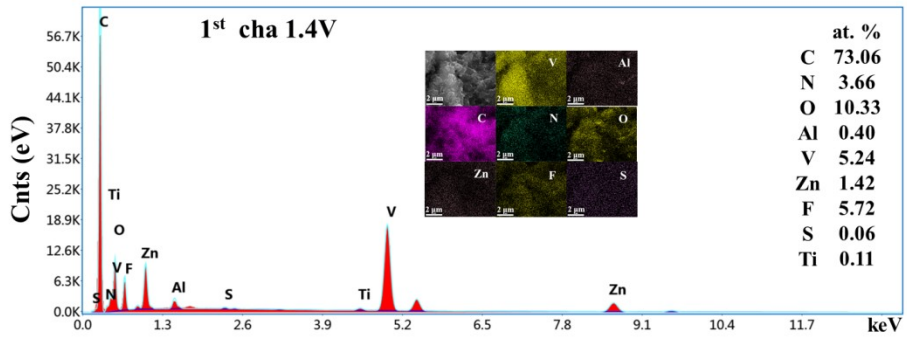

(f)



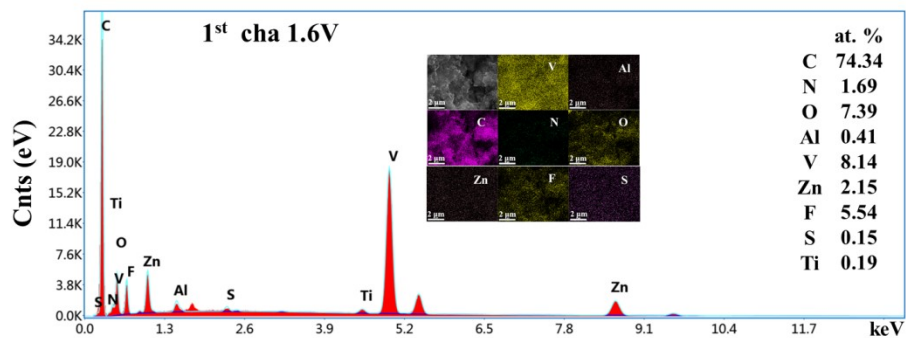

(g)

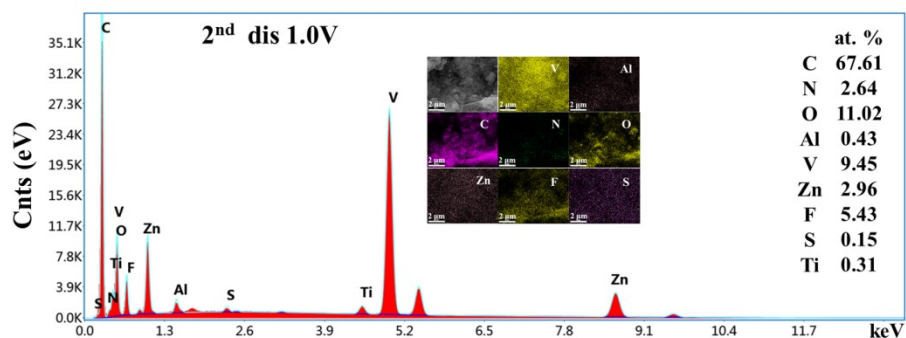

(h)

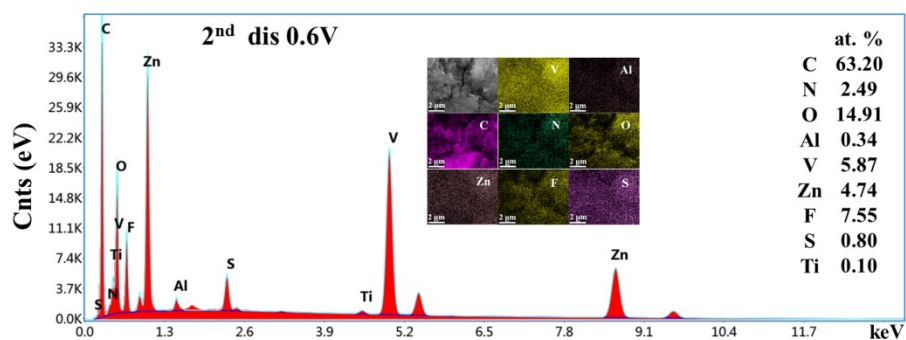

(i)

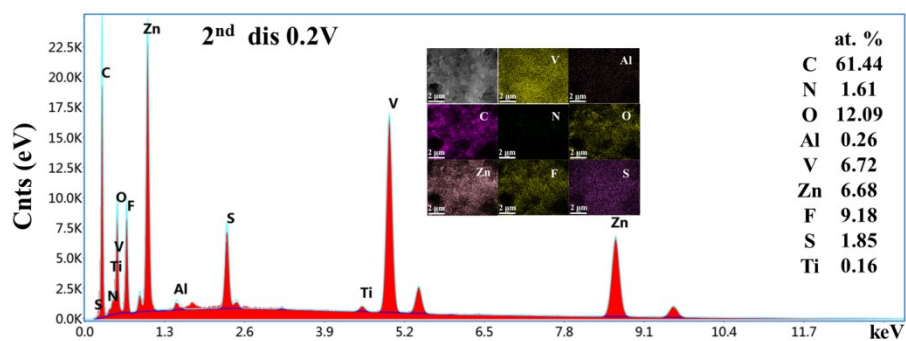

(j)



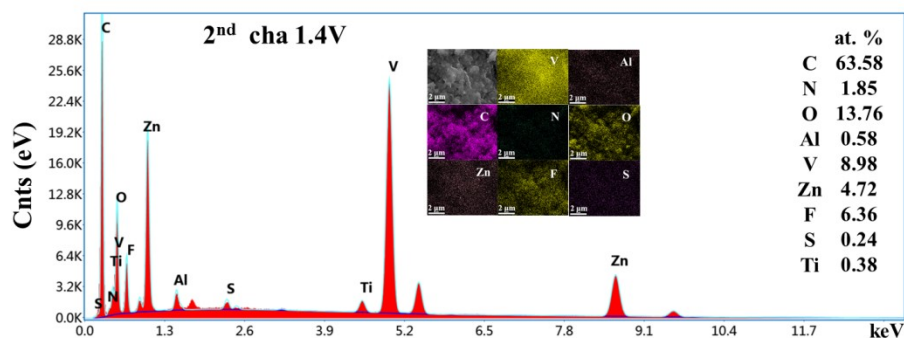

**Figure S13** *Ex situ* EDS and elemental mappings of the Al<sup>3+</sup>-doped V<sub>2</sub>O<sub>3</sub>/C electrode at different states: 1<sup>st</sup> discharge to (a) 0.6 and (b) 0.2 V; 1<sup>st</sup> charge to (c) 0.6, (d) 1.0, (e) 1.4 and (f) 1.6 V; 2<sup>nd</sup> discharge to (g) 1.0, (h) 0.6 and (i) 0.2 V, (j) 2<sup>nd</sup> charge to 1.4 V.

**Table S3** Comparison of the contents of C, N, O, Al, V, Zn, F, S and Ti elements in the Al<sup>3+</sup>-doped V<sub>2</sub>O<sub>3</sub>/C electrode at the different states

|                              | C     | N    | O     | Al   | V    | Zn   | F    | S    | Ti   |
|------------------------------|-------|------|-------|------|------|------|------|------|------|
| 1 <sup>st</sup> dis<br>0.6 V | 64.15 | 4.37 | 12.23 | 1.68 | 8.84 | 1.73 | 6.48 | 0.43 | 0.10 |
| 1 <sup>st</sup> dis<br>0.2 V | 70.48 | 3.76 | 7.88  | 1.22 | 8.95 | 1.27 | 5.92 | 0.37 | 0.15 |
| 1 <sup>st</sup> cha<br>0.6 V | 71.16 | 4.69 | 7.28  | 0.85 | 9.54 | 1.12 | 4.86 | 0.24 | 0.26 |
| 1 <sup>st</sup> cha<br>1.0 V | 71.57 | 3.05 | 8.45  | 1.19 | 6.08 | 1.98 | 6.91 | 0.72 | 0.05 |
| 1 <sup>st</sup> cha<br>1.4 V | 73.06 | 3.66 | 10.33 | 0.40 | 5.24 | 1.42 | 5.72 | 0.06 | 0.11 |
| 1 <sup>st</sup> cha<br>1.6 V | 74.34 | 1.69 | 7.39  | 0.41 | 8.14 | 2.15 | 5.54 | 0.15 | 0.19 |
| 2 <sup>nd</sup> dis<br>1.0 V | 67.61 | 2.64 | 11.02 | 0.43 | 9.45 | 2.96 | 5.43 | 0.15 | 0.31 |
| 2 <sup>nd</sup> dis<br>0.6 V | 63.20 | 2.49 | 14.91 | 0.34 | 5.87 | 4.74 | 7.55 | 0.80 | 0.10 |
| 2 <sup>nd</sup> dis<br>0.2 V | 61.44 | 1.61 | 12.09 | 0.26 | 6.72 | 6.68 | 9.18 | 1.85 | 0.16 |
| 2 <sup>nd</sup> cha<br>1.4 V | 63.58 | 1.85 | 13.76 | 0.58 | 8.98 | 4.72 | 6.36 | 0.24 | 0.38 |

(a)

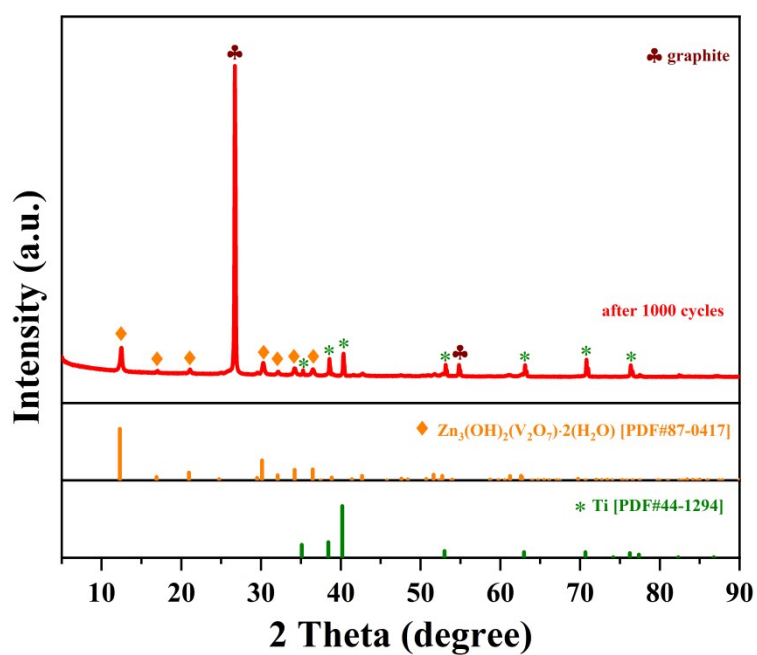

(b)

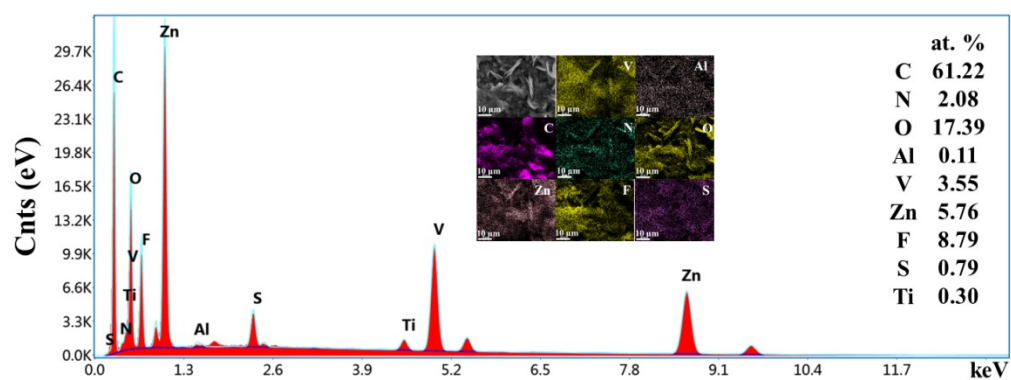

Figure S14 (a) XRD pattern and (b) EDS as well as elemental mappings (inset) of the  $\text{Al}^{3+}$ -doped  $\text{V}_2\text{O}_3/\text{C}$  electrode after 1000 discharge/charge cycles at  $5 \text{ A g}^{-1}$ .

(a)

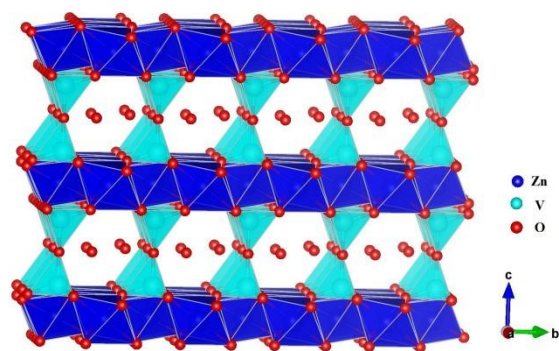

(b)

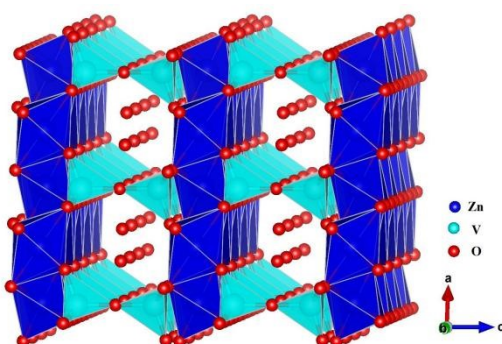

(c)

(d)

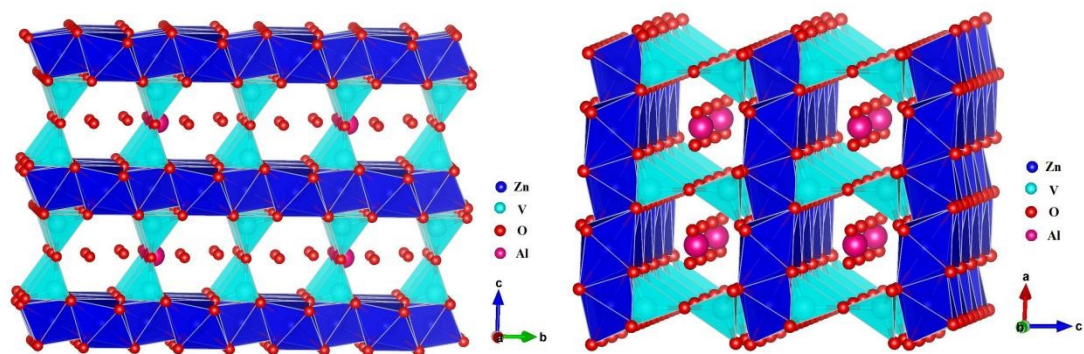

**Figure S15** 3D architectures of (a, b)  $\text{Zn}_3(\text{OH})_2\text{V}_2\text{O}_7 \cdot 2\text{H}_2\text{O}$  and (c, d) Al-doped  $\text{Zn}_3(\text{OH})_2\text{V}_2\text{O}_7 \cdot 2\text{H}_2\text{O}$  (H atoms omitted for clarity).

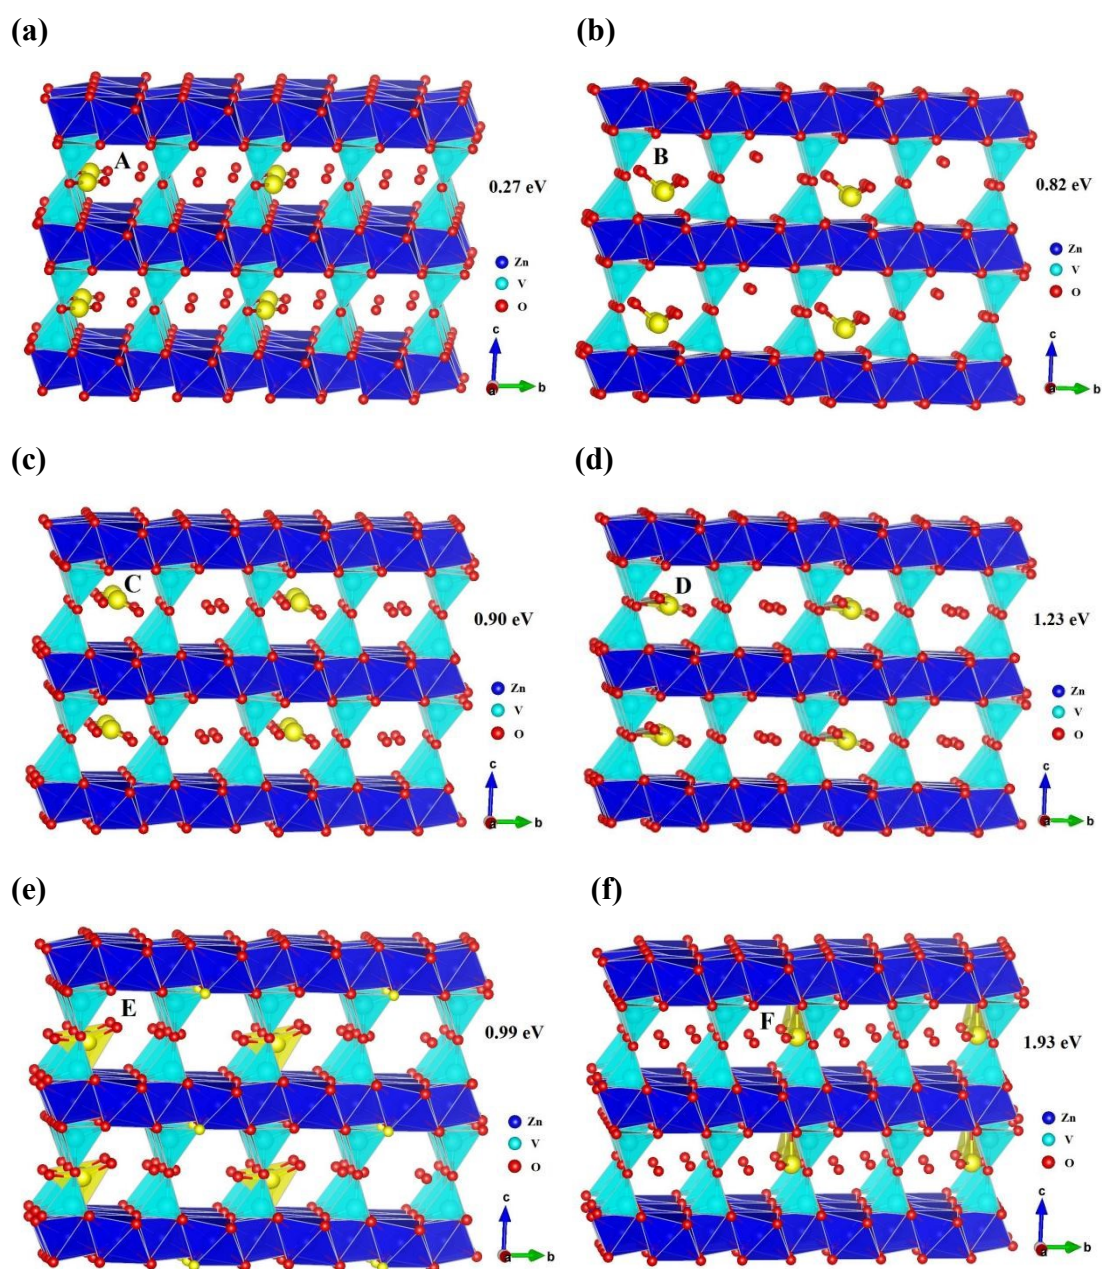

**Figure S16** The optimized configurations and the corresponding energies with  $\text{Zn}^{2+}$  adsorbed on sites (a) A, (b) B, (c) C, (d) D, (e) E and (f) F in  $\text{Zn}_3(\text{OH})_2\text{V}_2\text{O}_7 \cdot 2\text{H}_2\text{O}$  (H atoms omitted for clarity). The intercalated  $\text{Zn}^{2+}$  ions are denoted in yellow.

## Reference

1. S. T. Lutta, N. A. Chernova, P. Y. Zavalij and M. S. Whittingham, *J. Mater. Chem.*, 2004, **14**, 2922-2928.
2. F. Ming, H. Liang, Y. Lei, S. Kandambeth, M. Eddaoudi and H. N. Alshareef, *ACS Energy Lett.*, 2018, **3**, 2602-2609.
3. J. Ding, Z. Du, L. Gu, B. Li, L. Wang, S. Wang, Y. Gong and S. Yang, *Adv. Mater.*, 2018, **30**, e1800762.
4. X. Dai, F. Wan, L. Zhang, H. Cao and Z. Niu, *Energy Stor. Mater.*, 2019, **17**, 143-150.
5. M. Yan, P. He, Y. Chen, S. Wang, Q. Wei, K. Zhao, X. Xu, Q. An, Y. Shuang, Y. Shao, K. T. Mueller, L. Mai, J. Liu and J. Yang, *Adv. Mater.*, 2018, **30**, 1703725.
6. N. Zhang, M. Jia, Y. Dong, Y. Wang, J. Xu, Y. Liu, L. Jiao and F. Cheng, *Adv. Funct. Mater.*, 2019, **29**, 1807331.
7. P. Hu, T. Zhu, X. Wang, X. Wei, M. Yan, J. Li, W. Luo, W. Yang, W. Zhang, L. Zhou, Z. Zhou and L. Mai, *Nano Lett.*, 2018, **18**, 1758-1763.
8. W. Deng, Z. Zhou, Y. Li, M. Zhang, X. Yuan, J. Hu, Z. Li, C. Li and R. Li, *ACS Nano*, 2020, **14**, 15776-15785.
9. B. Sambandam, V. Soundharajan, S. Kim, M. H. Alfaruqi, J. Jo, S. Kim, V. Mathew, Y. K. Sun and J. Kim, *J. Mater. Chem. A*, 2018, **6**, 3850-3856.
10. P. He, Y. Quan, X. Xu, M. Yan, W. Yang, Q. An, L. He and L. Mai, *Small*, 2017, **13**, 1702551.
11. X. Wang, B. Xi, X. Ma, Z. Feng, Y. Jia, J. Feng, Y. Qian and S. Xiong, *Nano Lett.*, 2020, **20**, 2899-2906.
12. L. Fan, Z. Li, W. Kang and B. Cheng, *J. Energy Chem.*, 2021, **55**, 25-33.
13. W. Zhou, M. Chen, A. Wang, A. Huang, J. Chen, X. Xu and C. P. Wong, *J. Energy Chem.*, 2021, **52**, 377-384.
14. C. Xia, J. Guo, Y. Lei, H. Liang, C. Zhao and H. N. Alshareef, *Adv. Mater.*, 2018, **30**, 7.
15. T. Wei, Q. Li, G. Yang and C. Wang, *Electrochim. Acta*, 2018, **287**, 60-67.
16. L. L. Wang, K. W. Huang, J. T. Chen and J. R. Zheng, *Sci. Adv.*, 2019, **5**, 10.
17. L. Wang, K.-W. Huang, J. Chen and J. Zheng, *Sci. Adv.*, 2019, **5**, eaax4279.
18. M. Du, F. Zhang, X. Zhang, W. Dong, Y. Sang, J. Wang, H. Liu and S. Wang, *Sci China Chem*, 2020, **63**, 1767-1776.
19. W. Leng, L. Cui, Y. Liu and Y. Gong, *Adv. Mater. Interfaces*, 2021, **8**, 2101705.
